# Supplementary material
Source: publisher figshare collection journal article supplement (https://karger.figshare.com/ndownloader/files/26762921)
Supplement: Supplementary file 1 [file 26762921]

**Supplementary Table S1:** Multiple linear regression analysis of significant predictors of discharge FIMscore

| Predictors | Unstandardized Coefficients | Standardized Coefficients | Standard Error | p-value* |
| --- | --- | --- | --- | --- |
| Social isolation£ | -0.178 | -0.004 | 2.791 | 0.949 |
| Age | -0.249 | -0.096 | 0.170 | 0.147 |
| Sex (male vs. female) | -5.258 | -0.106 | 3.296 | 0.113 |
| Education | 5.791 | 0.133 | 2.752 | 0.038 |
| Presence of caregiver | 1.630 | 0.039 | 2.465 | 0.510 |
| Residency | 9.965 | 0.090 | 6.497 | 0.128 |
| BMI | 0.012 | 0.003 | 0.264 | 0.963 |
| Albumin Admission level | 8.373 | 0.150 | 3.258 | 0.011 |
| Fracture type | -0.528 | -0.012 | 2.437 | 0.829 |
| Fracture side | -2.636 | -0.064 | 2.262 | 0.246 |
| Ischemic Heart Disease | 4.518 | 0.096 | 3.127 | 0.151 |
| Congestive Heart Failure | 2.437 | 0.041 | 3.848 | 0.528 |
| Diabetes Mellitus | 2.795 | 0.066 | 2.603 | 0.285 |
| Hypertension | -5.318 | -0.111 | 2.687 | 0.050 |
| Cerebrovascular Disease | 3.858 | 0.070 | 3.233 | 0.235 |
| Peripheral Vascular Disease | 5.515 | 0.080 | 3.988 | 0.169 |
| Parkinson's Disease | -0.521 | -0.005 | 5.913 | 0.930 |
| Depression | 5.692 | 0.127 | 2.502 | 0.025 |
| COPD | 7.668 | 0.147 | 3.167 | 0.017 |
| Pre-fracture FIM score | 0.446 | 0.261 | 0.119 | <0.001 |
| MMSE | 2.183 | 0.627 | 0.249 | <0.001 |

£Admission during social isolation, 1/3/2020-30/6/2020

***r2= 0.826**

BMI= Body Mass Index; COPD=Chronic Obstructive Pulmonary Disease; FIM = Functional Independence Measure; MMSE= Mini Mental State Examination.

**Supplementary Table S2:** Logistic regression results predicting likelihood of favorable rehabilitation achievement**†**

| Predictors | Odds ratio | | 95% confidence interval | Significance |
| --- | --- | --- | --- | --- |
| Social isolation£ | | 0.970 | 0.34-2.76 | 0.954 |
| Age | | 0.991 | 0.93-1.06 | 0.798 |
| Sex (male vs. female) | | 1.308 | 0.37-4.60 | 0.676 |
| Education | | 1.557 | 0.54-4.46 | 0.410 |
| Presence of caregiver | | 0.905 | 0.36-2.30 | 0.834 |
| Residency | | 3.594 | 0.22-59.26 | 0.371 |
| BMI | | 1.009 | 1.91-1.12 | 0.861 |
| Admission Albumin level | | 1.397 | 0.40-4.83 | 0.597 |
| Fracture type | | 0.889 | 0.35-2.24 | 0.802 |
| Fracture side | | 0.716 | 0.30-1.69 | 0.447 |
| Ischemic Heart Disease | | 0.776 | 0.23-2.58 | 0.649 |
| Congestive Heart Failure | | 1.110 | 0.26-7.72 | 0.888 |
| Diabetes Mellitus | | 2.573 | 0.90-7.36 | 0.078 |
| Hypertension | | 1.087 | 0.38-3.14 | 0.878 |
| Cerebrovascular Disease | | 0.686 | 0.20-2.36 | 0.550 |
| Peripheral Vascular Disease | | 1.167 | 0.25-5.53 | 0.846 |
| Parkinson's Disease | | 0.584 | 0.05-6.28 | 0.657 |
| Depression | | 1.325 | 0.51-3.41 | 0.560 |
| COPD | | 2.768 | 0.88-8.74 | 0.082 |
| Pre-fracture FIM score | | 1.086 | 1.04-1.14 | 0.001 |
| MMSE | | 1.155 | 1.05-1.28 | 0.004 |

†Favorable rehabilitation achievement=mFIM efficiency >0.33

£ Admission during social isolation, 1/3/2020-30/6/2020

BMI= Body Mass Index; COPD=Chronic Obstructive Pulmonary Disease; FIM= Functional Independence Measure; MMSE= Mini Mental State Examination
